# Supplementary material for: Forest malaria: the prevailing obstacle for malaria control and elimination in India
Source: PubMed Central journal article supplement — BMJ Glob Health. 2021 May 14;6(5):e005391. doi: 10.1136/bmjgh-2021-005391 (PMC8127975; doi:10.1136/bmjgh-2021-005391), 2021-05-14
Supplement: bmjgh-2021-005391supp001.pdf [file bmjgh-2021-005391supp001.pdf]

Supplementary Table 1: List of Indian districts selected as per their forest cover for inclusion in the study

| <b>Sr. No</b> | <b>State Name</b> | <b>District Name</b>             | <b>GA covered by Forest (%)</b> |
|---------------|-------------------|----------------------------------|---------------------------------|
| 1             | Arunachal Pradesh | Changlang                        | 90.97                           |
| 2             | Arunachal Pradesh | Dibang Valley                    | 71.54                           |
| 3             | Arunachal Pradesh | East Kameng                      | 88.78                           |
| 4             | Arunachal Pradesh | East Siang                       | 77.18                           |
| 5             | Arunachal Pradesh | Lohit                            | 66.72                           |
| 6             | Arunachal Pradesh | Lower Dibang Valley (L/D/Valley) | 71.54                           |
| 7             | Arunachal Pradesh | Lower Subansiri                  | 90.84                           |
| 8             | Arunachal Pradesh | Papum Pare                       | 93.79                           |
| 9             | Arunachal Pradesh | Tawang                           | 56.45                           |
| 10            | Arunachal Pradesh | Tirap (Longding district)        | 75.49                           |
| 11            | Arunachal Pradesh | Upper Siang                      | 79.82                           |
| 12            | Arunachal Pradesh | Upper Subansiri                  | 82.78                           |
| 13            | Arunachal Pradesh | West kameng                      | 88.78                           |
| 14            | Arunachal Pradesh | West Siang                       | 86.83                           |
| 15            | Assam             | Cachar                           | 59.06                           |
| 16            | Assam             | Hailakandi                       | 59.23                           |
| 17            | Assam             | K-Anglong                        | 75.61                           |
| 18            | Assam             | Karimganj                        | 47.54                           |
| 19            | Assam             | N.C.Hills                        | 86.95                           |
| 20            | Assam             | Tinsukia                         | 40.53                           |
| 21            | Chhattisgarh      | Bastar(Kondagaon,Bijapur)        | 53.50                           |
| 22            | Chhattisgarh      | Dantewada(Sukma, Narayanpur)     | 64.24                           |
| 23            | Chhattisgarh      | Kanker                           | 47.56                           |
| 24            | Chhattisgarh      | Korba                            | 50.75                           |
| 25            | Chhattisgarh      | Korea                            | 62.19                           |

|    |                  |                                          |       |
|----|------------------|------------------------------------------|-------|
| 26 | Chhattisgarh     | Sarguja (Ambikapur, Surjapur, Balrampur) | 45.34 |
| 27 | Goa              | North Goa                                | 53.17 |
| 28 | Goa              | South Goa                                | 65.92 |
| 29 | Gujarat          | Dangs                                    | 77.64 |
| 30 | Himachal Pradesh | Mandi                                    | 42.41 |
| 31 | Himachal Pradesh | Shimla                                   | 46.50 |
| 32 | Himachal Pradesh | Sirmour                                  | 49.03 |
| 33 | Himachal Pradesh | Solan                                    | 43.90 |
| 34 | Jammu & Kashmir  | Kathua                                   | 52.77 |
| 35 | Jammu & Kashmir  | Udhampur                                 | 59.10 |
| 36 | Jammu & Kashmir  | Rajouri                                  | 47.15 |
| 37 | Jammu & Kashmir  | Poonch                                   | 43.55 |
| 38 | Jammu & Kashmir  | Baramullah / Kupwara                     | 25.22 |
| 39 | Jharkhand        | Chatra                                   | 47.62 |
| 40 | Jharkhand        | Koderma                                  | 41.53 |
| 41 | Jharkhand        | Palamau                                  | 40.74 |
| 42 | Karnataka        | Shivamogga                               | 51.99 |
| 43 | Karnataka        | Uttara kannada                           | 75.98 |
| 44 | Karnataka        | Chamarajanagar                           | 51.68 |
| 45 | Karnataka        | Dakshina Kannada                         | 62.72 |
| 46 | Karnataka        | Udupi                                    | 56.44 |
| 47 | Karnataka        | Chikkamagaluru                           | 51.12 |
| 48 | Karnataka        | Kodagu                                   | 81.40 |
| 49 | Kerala           | Triruvananthapuram                       | 61.54 |
| 50 | Kerala           | Kollam                                   | 53.39 |
| 51 | Kerala           | Pathanamthitta                           | 66.43 |
| 52 | Kerala           | Kottayam                                 | 40.35 |
| 53 | Kerala           | Idukky                                   | 78.30 |
| 54 | Kerala           | Wayanad                                  | 83.29 |
| 55 | Madhya Pradesh   | Sheopur                                  | 53.30 |
| 56 | Madhya Pradesh   | Umaria                                   | 49.90 |
| 57 | Madhya Pradesh   | Balaghat                                 | 54.14 |
| 58 | Madhya Pradesh   | Mandla                                   | 48.79 |
| 59 | Maharashtra      | Raigad                                   | 40.04 |
| 60 | Maharashtra      | Ratnagiri                                | 51.15 |
| 61 | Maharashtra      | Gadchiroli                               | 70.04 |
| 62 | Maharashtra      | Sindhudurg                               | 49.32 |
| 63 | Manipur          | Chandel                                  | 85.39 |
| 64 | Manipur          | Churachandpur                            | 93.54 |
| 65 | Manipur          | Senapati                                 | 66.74 |

|     |            |                     |       |
|-----|------------|---------------------|-------|
| 66  | Manipur    | Tamenglong          | 88.86 |
| 67  | Manipur    | Ukhrul              | 78.10 |
| 68  | Meghalaya  | East Khasi Hills    | 63.83 |
| 69  | Meghalaya  | Ri-Bhoi             | 89.27 |
| 70  | Meghalaya  | Jaintia Hills       | 85.88 |
| 71  | Meghalaya  | East Garo Hills     | 85.17 |
| 72  | Meghalaya  | West Khasi Hills    | 76.39 |
| 73  | Meghalaya  | West Garo Hills     | 80.05 |
| 74  | Meghalaya  | South Garo Hills    | 88.64 |
| 75  | Mizoram    | Aizawal East        | 91.33 |
| 76  | Mizoram    | Aizawal West        | 91.33 |
| 77  | Mizoram    | Lunglei             | 92.72 |
| 78  | Mizoram    | Saiha               | 92.21 |
| 79  | Mizoram    | Kolasib             | 88.35 |
| 80  | Mizoram    | Mamit               | 91.70 |
| 81  | Mizoram    | Champhai            | 87.44 |
| 82  | Mizoram    | Lawngtlai           | 92.61 |
| 83  | Mizoram    | Serchhip            | 84.94 |
| 84  | Nagaland   | Dimapur             | 51.72 |
| 85  | Nagaland   | Kohima              | 89.03 |
| 86  | Nagaland   | Mokokchung          | 83.53 |
| 87  | Nagaland   | Mon                 | 69.37 |
| 88  | Nagaland   | Phek                | 87.22 |
| 89  | Nagaland   | Tuensang            | 76.44 |
| 90  | Nagaland   | Wokha               | 84.64 |
| 91  | Nagaland   | Zunheboto           | 82.71 |
| 92  | Nagaland   | U.M.S. Dimapur      | 51.72 |
| 93  | Odisha     | Angul               | 41.84 |
| 94  | Odisha     | Boudh               | 40.51 |
| 95  | Odisha     | Deogarh             | 57.50 |
| 96  | Odisha     | Gajapati            | 57.50 |
| 97  | Odisha     | Phulbani(Kandhamal) | 68.18 |
| 98  | Odisha     | Nayagarh            | 42.80 |
| 99  | Odisha     | Rayagada            | 44.05 |
| 100 | Odisha     | Sambalpur           | 49.71 |
| 101 | Odisha     | Sundergarh          | 41.72 |
| 102 | Sikkim     | East Sikkim         | 73.27 |
| 103 | Sikkim     | West Sikkim         | 66.21 |
| 104 | Sikkim     | South Sikkim        | 76.13 |
| 105 | Tamil Nadu | The Nilgiris        | 81.84 |
| 106 | Telangana  | Khammam             | 43.23 |
| 107 | Tripura    | Unakuti             | 74.25 |
| 108 | Tripura    | Gomati              | 80.90 |
| 109 | Tripura    | Khowai              | 50.56 |
| 110 | Tripura    | North Tripura       | 74.25 |
| 111 | Tripura    | Dhalai Tripura      | 79.60 |

|            |                      |                        |       |
|------------|----------------------|------------------------|-------|
| <b>112</b> | Tripura              | West Tripura           | 69.43 |
| <b>113</b> | Tripura              | South Tripura          | 80.90 |
| <b>114</b> | Uttarakhand          | Dehradun               | 52.04 |
| <b>115</b> | Uttarakhand          | Pauri                  | 61.72 |
| <b>116</b> | Uttarakhand          | Tehri Garhwal          | 58.95 |
| <b>117</b> | Uttarakhand          | Rudraprayag            | 56.70 |
| <b>118</b> | Uttarakhand          | Nainital               | 72.69 |
| <b>119</b> | Uttarakhand          | Almora                 | 50.24 |
| <b>120</b> | Uttarakhand          | Bageshwar              | 61.49 |
| <b>121</b> | Uttarakhand          | Champawat              | 66.87 |
| <b>122</b> | West Bengal          | Darjeeling & Kalimpong | 72.69 |
| <b>123</b> | West Bengal          | Jalpaiguri             | 40.21 |
| <b>124</b> | Andaman & Nicobar    | South Andaman          | 40.21 |
| <b>125</b> | Andaman & Nicobar    | North & Middle Andaman | 83.38 |
| <b>126</b> | Andaman & Nicobar    | Nicobar                | 75.01 |
| <b>127</b> | Dadra & Nagar Haveli | Dadra & Nagar Haveli   | 42.97 |
| <b>128</b> | Lakshadweep          | Lakshadweep            | 84.56 |
| <b>129</b> | Puducherry           | Mahe                   | 54.44 |
